# Supplementary material
Source: Springer Nature journal article supplement (https://www.springermedizin.de/resource/supplementary/13058_2013_3430_MOESM3_ESM.pdf/9704152)

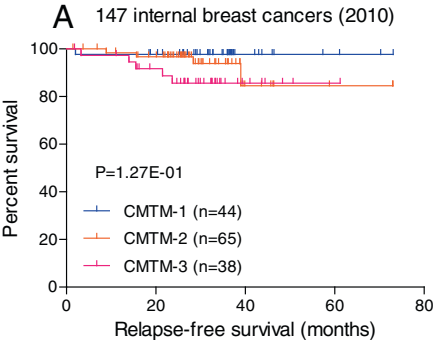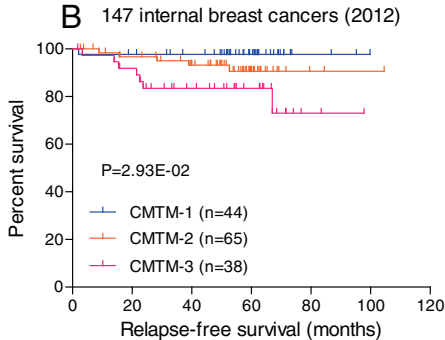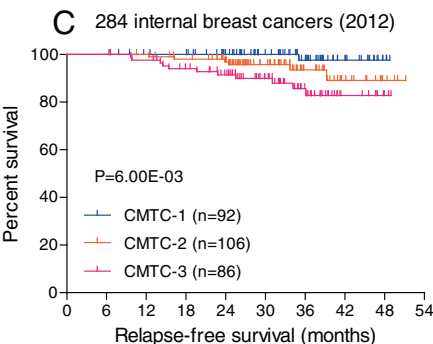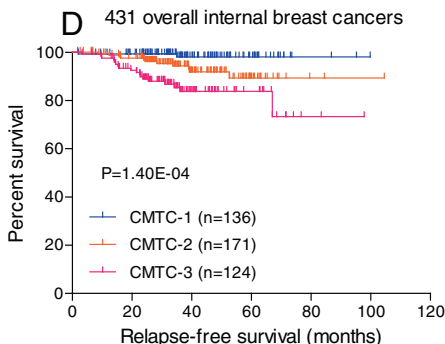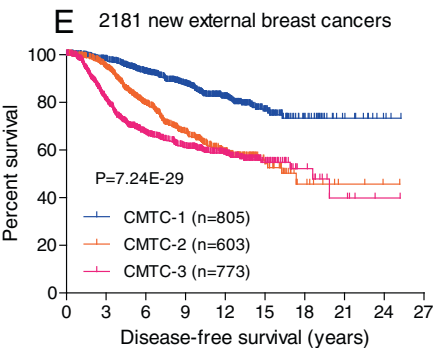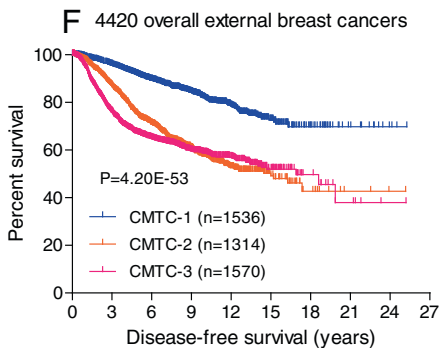

Supplement: MOESM3 [file 9704152]
